1 ***NAC-NOR* mutations in tomato Penjar accessions attenuate multiple**  
2 **metabolic processes and prolong the fruit shelf life**

3 Rakesh Kumar, Vajir Tamboli, Rameshwar Sharma, Yellamaraju Sreelakshmi\*

4 Repository of Tomato Genomics Resources, Department of Plant Sciences, University of  
5 Hyderabad, Hyderabad-500046, India

6 **\*Corresponding author**

7

8 **Email addresses of authors:**

9 Rakesh Kumar: [rakeshgupta.hcu@gmail.com](mailto:rakeshgupta.hcu@gmail.com)

10 Vajir Tamboli: [vajirchem@gmail.com](mailto:vajirchem@gmail.com)

11 Rameshwar Sharma: [rameshwar.sharma@gmail.com](mailto:rameshwar.sharma@gmail.com)

12 Yellamaraju Sreelakshmi: [syellamaraju@gmail.com](mailto:syellamaraju@gmail.com); Phone: 0091-40-23134771

13

14 **Running head:** Metabolite analysis of Penjar accessions

15 Word count: 5741

16 No. of Tables: 1

17 No. of Figures: 6

18 Supplementary Information: Figures S1-S16; Supplementary Tables S1-S6.

19

20 **Highlight**

21 The prolonged shelf life of tomato Penjar accessions bearing mutations in NAC-NOR  
22 transcription factor appears to be regulated by a combined effect of attenuation of respiration,  
23 altered cuticle composition, enhanced ABA and sucrose levels in fruits and downregulation  
24 of cell wall modification.

25 **Abstract**

26 Several Penjar accessions of tomato (*Solanum lycopersicum*), widely grown in the  
27 Mediterranean region, exhibit prolonged shelf life, and harbor *alcobaca* mutation with valine-  
28 106-aspartic acid substitution in the NAC-NOR protein. To uncover the metabolic basis  
29 underlying the prolonged shelf life, we compared four Penjar accessions to Ailsa Craig (AC).  
30 Three accessions bore *alcobaca* mutation, whereas fourth was a novel *NAC-NOR* allele with  
31 only six amino acids in the encoded protein. The cuticle composition among Penjars varied  
32 widely during the progression of fruit ripening. All Penjars exhibited delayed ripening,  
33 prolonged on-vine and off-vine shelf life, low ethylene emission and carotenoid levels albeit  
34 with accession-specific differences. Metabolic profiling revealed shifts in Krebs cycle  
35 intermediates, amino acids, and  $\gamma$ -aminobutyric acid levels indicating the attenuation of  
36 respiration in Penjars during post-harvest storage. The prolonged shelf life of Penjar fruits  
37 was associated with a concerted downregulation of a number of cell-wall modifying genes  
38 and cell-wall-related metabolites. The accumulation of higher ABA and sucrose levels at the  
39 onset of senescence in Penjar fruits likely contribute to reduced water loss. Our analyses  
40 reveal that in addition to specialized cuticle composition, the attenuation of various metabolic  
41 processes by *NAC-NOR* mutation likely prolongs the shelf life of Penjar fruits.

42

43 **Key words:** Tomato (*Solanum lycopersicum*), fruit shelf life, NAC-NOR, metabolite  
44 analysis, cuticle composition, hormones, cell wall modification.

45

46

## 47 **Introduction**

48           Among the factors that influence the economic value of fruits, the post-harvest shelf  
49 life is the foremost, as shorter shelf life causes losses during transportation, distribution, and  
50 storage. Consistent efforts have been made over last few decades to decipher the molecular-  
51 genetic basis underlying the process of fruit ripening and spoilage (Klee and Giovannoni,  
52 2011; Pirrello, 2009; Seymour et al. 2013). Genetic regulation of fruit ripening is mainly  
53 deciphered in tomato, where spontaneous mutants such as *rin*, *nor* and *Cnr*, fail to undergo  
54 characteristic accumulation of lycopene in the fruits and remain firm for a long time  
55 (Giovannoni, 2007). The *RIN*, *CNR* and *NOR* genes encode for transcription factors  
56 belonging to MADS, SBP box, and NAC family respectively (Seymour et al. 2013).

57           The *nor* mutant family has two alleles; *nor* with truncated protein, and *alcobaca* (*alc*)  
58 with a single amino acid substitution (Casals et al. 2012; Giovannoni, 2004). The cultivars  
59 harboring either of these alleles show prolonged shelf life of fruits, albeit duration depends on  
60 the fruit size and genetic background (Garg et al. 2008a,b; Casals et al. 2012; Mutschler et al.  
61 1988). The biochemical characterization of *nor/alc* mutants revealed that compared to normal  
62 ripening cultivars, the *nor/alc* fruits had altered cuticle composition with denser cutin matrix  
63 (Kosma et al. 2010; Saladié et al. 2007), were deficient in carotenoids accumulation, and  
64 were resistant to infections (Garg et al. 2008a,b). As *NOR* mutation is strongly associated  
65 with long shelf life, search for additional NAC family transcription factors revealed a role for  
66 *NAC1* and *NAC4* in tomato ripening (Ma et al. 2014; Zhu et al. 2014).

67           The onset of ripening in tomato initiates several irreversible processes such as  
68 changes in metabolite composition, loss of chlorophyll, accumulation of carotenoids and cell  
69 wall softening (Carrari et al. 2006; Fraser et al. 2007; Giovannoni, 2007). These responses are  
70 triggered by the climacteric rise of ethylene in the fruits, a process that is subdued in the *nor*  
71 mutants. Current evidences indicate that in addition to ethylene, other hormones like abscisic  
72 acid (ABA), jasmonic acid (JA), methyl jasmonate (MeJA), auxin, etc. also affect fruit  
73 ripening and quality (Kumar et al. 2014; McAtee et al. 2013). It is believed that *NOR* acts  
74 upstream to ethylene in regulating the ripening of tomato (Giovannoni, 2007). However, it is  
75 not known whether *NOR* influences the levels of other hormones during ripening.

76           The studies using transgenic manipulation of genes revealed that softening of tomato  
77 fruits can be prevented by silencing of ethylene biosynthesis (Oeller et al. 1991; Xie et al.  
78 2006) and perception (Tieman et al. 2000), increasing polyamine biosynthesis (Nambeesan et  
79 al. 2010), suppression of ABA biosynthesis (Sun et al. 2012), and downregulation of  
80 enzymes participating in cell wall degradation (Brummell et al. 2002; Vicente et al. 2007;

81 Uluisik et al. 2016). The transpirational water loss through cuticle also affects the fruit  
82 firmness. Thus fruits that retain cellular turgidity remain firm for longer periods (Saladié et  
83 al. 2007). From the foregoing, it is apparent that a combination of multiple processes likely  
84 regulates prolonged shelf life of *nor/alc* mutants. However, only limited information is  
85 available about modulation of these processes in the *nor/alc* mutants (Casals et al. 2015;  
86 Saladie et al. 2007, Osorio et al. 2011).

87 Breeders have used *alc* for better fruit quality, though hybrid fruits have a slightly  
88 shorter shelf life than *rin* or *nor* hybrids (Garg et al. 2008a,b). Among the landraces grown in  
89 Mediterranean, the Penjars are popular for long post-harvest shelf life. Several Penjar  
90 accessions bear the *alc* mutation (Casals et al. 2012), however, little is known about the  
91 metabolic profiles of fruits during postharvest storage. In the current study, we analyzed four  
92 Penjar accessions during ripening and post-harvest storage to decipher the metabolic basis for  
93 the prolonged shelf life.

94

## 95 **Materials and Methods**

### 96 **Plant material and post-harvest analysis**

97 Penjar accessions (a gift from RF Muñoz) and tomato (*Solanum lycopersicum*)  
98 cultivar Ailsa Craig were grown in pots between October to February (day 30±2°C, night  
99 18±2°C) season, which is similar to Mediterranean summer. The fruits were collected at  
100 mature green (MG), breaker (BR) and red ripe (RR) stages. For Penjars, attainment of  
101 uniform fruit coloration was considered equivalent to RR stage. The pericarps were snap-  
102 frozen in liquid nitrogen and stored at -80°C until analysis. Freshly harvested RR fruits were  
103 incubated at 24±2°C under natural day/night conditions. The appearance of wrinkling was  
104 considered as the onset of senescence (SEN). On post-harvest storage, the Penjar-2 fruit was  
105 first to show wrinkling at 65-days, which was considered as SEN. The weight loss during  
106 post-harvest storage was monitored by periodic weighing of fruits.

### 107 **Sequence, SNP, promoter and SIFT analysis**

108 The *NOR* promoter (1834 bp) and cDNA were amplified from AC and Penjars  
109 (Primer details in Table S1), and PCR products were sequenced (Macrogen, South Korea).  
110 The SNPs were identified using Multialin Interface page (Corpet et al. 1988). The amino acid  
111 sequences were aligned using Multialin or PRALINE software  
112 (<http://www.ibi.vu.nl/programs/pralinewww/>) (Bawono and Heringa, 2014). The promoter  
113 sequences (3 Kb) of genes were retrieved from SOL genomics network  
114 (<https://solgenomics.net/>) and analyzed for NAC transcription factor binding sites using  
115 PlantPAN 2.0 (<http://PlantPAN2.itsps.ncku.edu.tw>) (Chow et al. 2016). The deleterious effect  
116 of non-synonymous polymorphisms was calculated by SIFT ([www.sift.dna.org](http://www.sift.dna.org); version  
117 4.0.5) (Sim et al. 2012). For SIFT score ≥0.05, SNPs were predicted as tolerated, whereas  
118 score ≤ 0.05 was predicted to be deleterious for the protein function.

### 119 **Carotenoids, hormones, transcripts and fruit metabolites analysis**

120 The carotenoid content was estimated using Gupta et al. (2015) protocol. The ethylene  
121 emission and hormone analysis were carried out as described in Kilambi et al. (2013) and  
122 Bodanapu et al. (2016) respectively. RNA was extracted from fruits in three biological  
123 replicates using hot phenol method (Verwoerd et al. 1989) and q-PCR was carried out as  
124 described earlier (Kilambi et al. 2013) (Primer details in Table S1). Tomato fruit metabolites  
125 were extracted, analyzed and identified using GC-MS as described in Bodanapu et al. 2016.

### 126 **Analysis of cuticle components**

127 For cuticular wax and cutin monomers analysis, five biological replicates at MG and  
128 RR were used. The total cuticular wax was isolated as described by Leide et al. (2007). Intact  
129 fruits were dipped for 2 min in chloroform and 5-Pregnen-3 $\beta$ -ol-20-one was added as an  
130 internal standard. The solvent was evaporated under nitrogen to 1 mL followed by drying in a  
131 Speed Vac before GC-MS. The cuticle membrane (CM) of fruits was isolated using pectinase  
132 and cellulase in 50 mM citrate buffer (pH 4.5, supplemented with NaN<sub>3</sub>). Isolated 1 cm<sup>2</sup> size  
133 CMs were repeatedly washed with MilliQ water and air dried. CMs were dewaxed as  
134 described by Kosma et al. (2010). Dried CMs were treated with chloroform: methanol (1:1;  
135 v/v) for 24 h followed by washing with methanol (4-5 times) to remove chloroform. The  
136 dewaxed CMs were depolymerized by alkaline hydrolysis (Osman et al. 1995) and  
137 derivatized for 30 min with 80  $\mu$ L MSTFA at 37°C. 10  $\mu$ L of 5-Pregnen-3 $\beta$ -ol-20-one (1  
138 mg/mL) was used as internal standard for cuticular wax and cutin analysis.

139 For GC-MS, 1  $\mu$ L sample was injected to RXi column as described for fruit  
140 metabolites in Bodanapu et al. 2016 in a splitless mode. Cutin and wax components were  
141 separated using the following program: 1 min at 50°C with a linear ramp of 10°C/min to  
142 180°C and held at 180°C for 2 min, again a linear ramp of 3°C/min to 300°C and then held at  
143 300°C for 18 min. Both ion source and injector temperature were 250°C and helium was used  
144 as carrier gas at a flow rate of 1.5 mL/min. The mass spectra were recorded at a scan rate of 2  
145 scans/sec with a scanning range of 40 to 850 m/z. The raw data were processed, and  
146 metabolite identity was assigned as described above for GC-MS analysis.

#### 147 **Statistical analysis**

148 For all experiments, a minimum of 3-5 biological replicates was used and mean with  
149 the standard error was calculated. The **StatisticalAnalysisOnMicrosoft-Excel** software  
150 ([http://prime.psc.riken.jp/Metabolomics\\_Software/StatisticalAnalysisOn-MicrosoftExcel/](http://prime.psc.riken.jp/Metabolomics_Software/StatisticalAnalysisOn-MicrosoftExcel/))  
151 was used to obtain significant differences between data points using Student's test ( $P \leq 0.05$ ).  
152 PCA was carried out using metaboanalyst 3.0.

#### 153 **Network analysis**

154 The carotenoid, hormone, *PSYI* and *CYCB* abundances for Penjars and AC were pair-  
155 wise correlated at MG, BR and RR stages (n=3, P-value  $\leq 0.05$ ) using the Pearson's  
156 Correlation coefficient (PCC). The associations with a PCC value ( $r \geq 0.8$  (+/-)) were used to  
157 create a network, and were visualized using Cytoscape (<http://www.cytoscape.org/>) (Shannon  
158 et al. 2003). The red and gray edges indicate negative and positive correlations respectively.

#### 159 **Accession Numbers**

160           The accession numbers of genes examined in this study are given in Table S1 along  
161 with the primer sequences used for amplification.

162

## 163 **Results**

164 Penjar tomatoes cultivated in northeastern Spain are harvested during July to  
165 September for consumption in winter owing to their longer shelf life. In this study, we  
166 compared the cuticle composition, primary metabolites, hormones, carotenoids composition,  
167 and cell wall modification in four Penjar accessions with a normal ripening cultivar, Alisa  
168 Craig (AC).

### 169 **Penjar-1 has two novel *NOR* mutations**

170 To uncover the genetic basis of prolonged shelf life, we amplified and sequenced the  
171 full-length cDNA of *NOR* gene from all four Penjars (Figure 1; Fig. S1A; Table S1). Notably,  
172 two mutations present in Penjar-1 were novel, the C to A transversion at 20<sup>th</sup> position created  
173 a stop codon resulting in a truncated *NOR* protein with only six amino acids (Figure 1) and  
174 downstream C to A transversion at 37<sup>th</sup> position led to glutamine to lysine substitution at the  
175 13<sup>th</sup> position of the protein. Excepting Penjar-1, other three accessions possessed a single  
176 base change similar to *alc* mutant (T to A at 316<sup>th</sup> position of cDNA; substitution of valine to  
177 aspartic acid at 106<sup>th</sup> position of *NOR* protein, Fig. S1B) akin to the mutation present in 27  
178 Penjar accessions (Casals et al. 2012). The low SIFT score (<0.05) (Ng and Henikoff, 2003;  
179 Sim et al. 2012) predicted that the mutations in all four accessions are deleterious for *NOR*  
180 protein function. The examination of *NOR* gene promoter (1834 bp) did not reveal any  
181 additional SNPs in above accessions (Fig. S1C).

### 182 **Penjars exhibit delayed ripening and prolonged shelf life**

183 The tomato fruits are considered fully ripe when the fruits acquire uniform red  
184 coloration, albeit ripe Penjar fruits exhibited different colors. At the ripe stage, fruits of  
185 Penjar-2 were light red, Penjar-1 were yellow-orange and Penjar-3 and -4 were orange  
186 colored (Fig. S2A). The attainment of uniform coloration by Penjar fruits was considered  
187 equivalent to the *red ripe* stage (RR) of AC.

188 The fruit growth of Penjars was nearly similar to AC up to *mature green* stage (MG).  
189 Post-MG stage, the transition period to *breaker* stage (BR) in Penjars and AC was nearly  
190 similar and also akin to *nor*, *alc* and DFD (Mutschler et al. 1992; Saladié et al. 2007;  
191 Simpson et al. 1976) (Fig. S2B). However, BR to RR transition (8-15 days) was more  
192 prolonged in Penjars than AC, with Penjar-1 being slowest (15 days). Apart from delayed  
193 ripening, all Penjars exhibited extended shelf life both on-vine and off-vine. The on-vine  
194 ripened Penjar fruits manifested no visible signs of shriveling even after 130 days *post-*  
195 *anthesis* (DPA) (Simpson et al. 1976), while AC fruits shriveled at 70-80 DPA (Fig. S3).



196 We next examined in detail the off-vine shelf life of Penjars and AC. The fruits  
197 harvested at RR were monitored for wrinkling at regular intervals. In AC, wrinkling appeared  
198 on 10<sup>th</sup>-day post-harvest (DPH), became prominent by 20 DPH followed by shrinking of  
199 fruits due to water loss (Figure 2A). At 65 DPH, the shrinkage was markedly apparent, and  
200 fruits lost 40% of initial weight. Contrastingly, all Penjar fruits even after 65 DPH retained  
201 80-90% of initial weight and displayed no wrinkling (Figure 2B). By 80 DPH, AC fruits were  
202 completely shriveled, whereas, Penjar-1, -3 and -4 showed no signs of wrinkling even at 150  
203 DPH. Among these, Penjar-2 fruits manifested wrinkling by 65 DPH; therefore 65 DPH was  
204 selected as the onset of senescence (SEN) for the subsequent post-harvest studies.

### 205 ***NOR* and *RIN* expression is altered in Penjars**

206 In tomato, *RIN* and *NOR* are two key regulators of ripening and shelf life  
207 (Giovannoni, 2001). To ascertain the role of these regulators in ripening and shelf life of  
208 Penjar fruits, their transcript levels were analyzed by qRT-PCR (Fig. S4). Consistent with the  
209 long shelf life, the *NOR* expression in Penjar fruits at RR was significantly lower than AC.  
210 The *NOR* expression declined in AC and Penjars (except Penjar-1, -2) at SEN. Interestingly,  
211 *RIN* transcript was below the detection limit at MG in AC and thereafter increased  
212 progressively. The reduced expression of *RIN* in Penjar-1 at RR and SEN is in consonance  
213 with it being a knockout mutant. Other Penjars showed higher *RIN* expression at RR and the  
214 levels were similar to AC at SEN.

### 215 **Penjars show wide variation in cuticle composition**

216 The cuticle protects fruit firmness by preventing transpirational water loss. Consistent  
217 with this, stripping of the cuticular wax (CW) by chloroform accelerated shrinkage (Figure  
218 3A) and water loss of Penjar fruits akin to AC (Fig. S5A). The analysis of CW revealed the  
219 presence of nearly 100 compounds that were classified into five categories: hydrocarbons  
220 (alkanes, alkenes), fatty acids, fatty acid alcohols, aromatic and miscellaneous compounds  
221 (sterols and triterpenoids) (Fig. S5B, Table S6). At MG, the CW levels were very high in  
222 Penjars than AC barring Penjar-1. At RR though CW content increased in all Penjars and AC,  
223 only Penjar-3, -4 had levels higher than AC (Figure 3B).

224 The relative abundance of different cuticle components distinctly differed between  
225 four Penjars as well as with AC (Figure 3B-F; Fig. S5). The abundance of nine detected  
226 alkanes in RR fruits widely differed in Penjars and AC, excepting C29 alkane that was 1.5-2  
227 fold higher in Penjars than AC. While few fatty acids classes at MG were more abundant in  
228 Penjars than AC, the abundance of these fatty acids distinctly changed at RR. Several fatty  
229 acid alcohols were most abundant in Penjars particularly at MG, and their levels significantly

230 increased during ripening. Compared to stigmasterol, the levels of all triterpenes changed  
231 during the transition to RR, albeit variably among different Penjars and AC.

232 Several cutin components such as glycerol, hydroxy hexadecanoic acid, octadecanoic  
233 acid, 18-OH octadecanoic and 9,18-diOH octadecanoic were higher in all four Penjars at MG  
234 compared to AC (Table 1). However, at RR only glycerol was higher in all four Penjars than  
235 AC. The other cutin components in Penjars though varied did not show any concerted  
236 increase or decrease like glycerol on comparison to AC. Analogously, the analysis of  
237 transcript levels of fourteen genes putatively regulating cuticle biogenesis showed  
238 upregulation of *cutin deficient 2 (CD2)*, *MIXTA*, *ABC transporter G family member 11*  
239 (*WBC11*), *glycerol-3-phosphate acyltransferase 6 (GPAT6)*, *3-ketoacyl-CoA reductase 1*  
240 (*KCRI1*), *enoyl-CoA reductase (ECR)*, and downregulation of *fatty acyl-ACP thioesterase*  
241 (*FATB*) in MG fruits of all Penjars compared to AC (Fig. S6; Table S1). However, at RR only  
242 *FATB* transcript was commonly altered reinforcing that the cuticle biogenesis is more  
243 specifically modulated in Penjars at MG than at RR.

#### 244 **Cell wall modifying genes are downregulated in Penjars**

245 In tomato, fruit ripening is accompanied by progressive softening of cell walls by a  
246 battery of cell-wall specific enzymes, whose suppression extends fruit shelf life (Brummell et  
247 al. 2002; Cantu et al. 2007; Meli et al. 2010; Uluisik et al. 2016). To ascertain whether the  
248 extended shelf life of Penjar fruits is linked with the reduced expression of genes encoding  
249 cell wall modifying enzymes, expression of *polygalacturonase (PG-2A, PG- $\beta$ )*, *expansin*  
250 (*EXP*), *pectin methylesterase (PME)*, *galactosidase ( $\alpha$ -GAL,  $\beta$ -GAL)*, *mannosidase ( $\alpha$ -MAN,*  
251  *$\beta$ -MAN)*, *deoxyhypusine synthase (DHS)* and *hexosaminidase (HEX)* was examined.  
252 Consistent with the above notion, expression of at least eight cell wall modifying genes-  *$\beta$ -*  
253 *GAL*,  *$\alpha$ -GAL*,  *$\alpha$ -MAN*,  *$\beta$ -MAN*, *PG- $\beta$* , *PME*, *EXP*, and *DHS* was downregulated at RR of  
254 Penjar fruits (Figure 4). Only *PG2A* and *HEX* genes showed higher expression at RR in  
255 Penjar-1, and -2 than AC. At SEN, Penjars showed accession-specific variation in gene  
256 expressions. All Penjars showed higher expression of  *$\alpha$ -MAN*,  *$\beta$ -MAN*, *PG- $\beta$*  genes than AC.  
257 Among different Penjars, expression of  *$\alpha$ -GAL* and *PG2A* was greater in Penjar-1, and -3,  *$\beta$ -*  
258 *GAL* was elevated in Penjar 2, *PME* and *EXP* was higher in Penjar-3, and *DHS*, *HEX* was  
259 enhanced in Penjar-3, -4 than AC. The analysis of promoters of above genes revealed the  
260 presence of multiple NAC binding sites (Fig. S7; Table S4).

#### 261 **Hormone profiling**

262 In tomato, a climacteric fruit, ethylene production is coupled to ripening and the  
263 associated fruit coloration and softening (Alexander and Grierson, 2002). Though the overall

264 pattern of ethylene emission was similar in AC and Penjars, consistent with delayed ripening  
265 and lower carotenoid content, the Penjar fruits emitted significantly less ethylene than AC  
266 (Fig. S8A), excepting Penjar-2 that emitted slightly higher ethylene at BR. In consonance  
267 with reduced ethylene emission, at RR, the transcript levels of key genes of system II  
268 ethylene biosynthesis - *1-aminocyclopropane-1-carboxylate synthase 2 and 4 (ACS2, ACS4)*,  
269 and at BR of *1-aminocyclopropane-1-carboxylic acid oxidase 1 (ACO1)* were significantly  
270 lower in Penjars than in AC (Fig. S8B-D). In contrast, system I ethylene biosynthesis gene-  
271 *ACO3* levels (Fig. S8E) were similar in Penjars and AC at BR (except Penjar-3 and -4) and  
272 RR (except Penjar-2 and -4). Nearly equal gene expression of *ACS2, 4* and *ACO1* at BR in  
273 Penjar-2 and AC may be related to slightly higher ethylene emission from Penjar-2 fruits.

274 In tomato, other hormones like jasmonate (JA), methyl jasmonate (MeJA) and  
275 salicylic acid (SA) also play important roles in lycopene accumulation (Kumar et al. 2014;  
276 Liu et al. 2012). In both AC and Penjars, the transition to RR upregulated JA levels.  
277 However, the stimulation was substantially lower in Penjars (Figure 5). The upregulation of  
278 JA was sustained at SEN in AC, and light-red fruited Penjar-2, while it declined in  
279 yellow/orange-fruited Penjars. Contrastingly, Penjar accessions showed changes in MeJA  
280 levels that were opposite to AC during the transition from MG to BR with a steady level at  
281 RR (except Penjar-2) and a decline at SEN. In tomato, lycopene accumulation in fruits  
282 requires higher SA levels during early stages of ripening (Ding and Wang, 2003). Consistent  
283 with this, while SA level in MG/BR fruits of AC was significantly higher than RR, it was  
284 much lower in Penjars at MG and BR.

285 Also, the levels of abscisic acid (ABA), indole-3-acetic acid (IAA), indole-3-butyric  
286 acid (IBA) and zeatin were altered in Penjar fruits (Figure 5). In AC, ABA level increased  
287 during ripening and then declined at SEN, whereas Penjars showed only modest variations  
288 during ripening, but with upregulation at SEN. Both Penjars and AC did not show a  
289 consistent pattern for IAA levels, except that Penjars had significantly low IAA levels  
290 (barring Penjar-1 at MG). Conversely, the IBA levels gradually declined in AC from MG to  
291 SEN, and Penjar-4 retained consistently steady IBA levels at all stages. In higher plants  
292 leaves, cytokinin reportedly inhibits the senescence process (Lim et al. 2007), however, in  
293 both AC and Penjars, zeatin levels did not correlate with fruit senescence.

#### 294 **Penjars show reduced *PSYI* expression**

295 Since ripe Penjar fruits do not acquire typical deep red coloration, it was assumed that  
296 *NOR* mutations might have influenced the carotenogenesis in fruits. Profiling of carotenoids  
297 at different stages revealed substantially low carotenoid levels in Penjars (Fig. S9), akin to

298 *nor* and *alc* (Kopeliovitch et al. 1979; Sink Jr. et al. 1974). Consistent with light-red color,  
299 Penjar-2 fruits accumulated higher levels of phytoene, phytofluene, and lycopene than other  
300 three Penjars. In tomato, *phytoene synthase 1 (PSYI)* and chromoplast-specific *lycopene  $\beta$ -*  
301 *cyclase (CYCB)* genes are two key regulators of carotenogenesis in fruits, and their increased  
302 expression from MG to RR is closely associated with carotenoid accumulation (Hirschberg,  
303 2001). The reduced *PSYI* expression at RR is consistent with lower carotenoid levels in  
304 respective Penjars, with the least reduction in Penjar-2 (Fig. S10). Interestingly, Penjar-1  
305 fruits showed 2-fold higher *CYCB* expression at RR than AC, which is reflected as high  $\beta$ -  
306 carotene/lycopene ratio than other Penjars (Table S2A). The transition from RR to SEN in  
307 Penjar fruits was marked by an accelerated loss in carotenoids levels (~50-70%) than AC  
308 (26%) (Table S2B). Among *PSYI* and *CYCB*, at SEN, the *PSYI* expression declined more  
309 severely in Penjars than in AC. In contrast, *CYCB* expression though decreased in Penjars yet  
310 was 2-3 folds higher than AC. The correlation networks ( $r = 0.8$ ) consisting of most abundant  
311 carotenoids, *PSYI* and *CYCB* expression and the hormones during ripening revealed  
312 interesting patterns (Fig. S11; Table S3). Penjar-1, -2 -3, and AC showed a strong positive  
313 correlation between JA and carotenoid levels, and ethylene and *PSYI* expression levels. In  
314 contrast, Penjar-4 showed very few interactions compared to other Penjars and AC. Though  
315 other hormones also interacted with different carotenoids and transcripts, these varied  
316 between different Penjars.

### 317 **Metabolite analysis in Penjars**

318 Using GC-MS, we identified ~110 primary metabolites in the MG, BR, RR and SEN  
319 fruits of AC and Penjars (Table S5). Notwithstanding the diverse metabolite composition in  
320 AC and different Penjars, principal component analysis (PCA) revealed that the metabolite  
321 profiles of ripening Penjars were closer and overlapped with each other (Fig. S12A). At SEN,  
322 while the profiles were closer in PC1, they showed accession-specific differences in PC2  
323 (Fig. S12B). Based on functional groups, the identified metabolites were classified as organic  
324 acids, amino acids, amines, fatty acids, and sugars. On the metabolic pathway, only those  
325 metabolites with  $\geq 1.5$  fold ( $\text{Log}_2$  Penjar/AC value of 0.58;  $P \leq 0.05$ ) upregulation or  
326 downregulation in Penjar fruits compared to AC were mapped (Figure 6).

### 327 **Penjars show differential accumulation of Krebs cycle intermediates**

328 The fruits of Penjars displayed differential accumulation of Krebs cycle intermediates  
329 during ripening and postharvest storage (Fig. S13). Particularly in Penjars, organic acids  
330 levels were lower than AC during ripening. Citrate, the most abundant organic acid in ripe  
331 fruits, was significantly lower in Penjar fruits at SEN, whereas, at RR, the citrate level was

332 lower in Penjar-1 and -3 than AC. Likewise, the acotinate levels in RR fruits were also highly  
333 reduced than AC, albeit at SEN, the levels were nearly similar. Though the levels were low at  
334 RR, malate, fumarate and methyl maleate were significantly upregulated at SEN in Penjars.  
335 The levels of succinate in Penjar fruits decreased during ripening and SEN.

### 336 **Penjars exhibit low levels of amino acids during ripening and post-harvest storage**

337 During tomato ripening, suppression of climacteric rise of ethylene reportedly reduces  
338 the amino acid content (Gao et al. 2007). Consistent with reduced ethylene emission in Penjar  
339 fruits, the levels of several amino acids (12) were lower than in AC. At MG, free amino acids  
340 such as alanine, leucine, isoleucine, valine, glycine, serine, alanine-3-cyano, threonine,  
341 aspartic acid, beta-alanine, glutamine, GABA, etc., were relatively low in both AC and Penjar  
342 (except Penjar-3) fruits (Fig. S14). The onset of ripening stimulated a modest increase in the  
343 amino acids and amines in AC and Penjar-2 fruits at BR. Interestingly, the GABA levels  
344 declined in all Penjars by 2.5-5 fold at BR. At RR, in most Penjars, the amino acids such as  
345 beta-alanine, GABA, isoleucine, glycine, serine, alanine-cyano, threonine, aspartic acid,  
346 asparagine, and hydroxylamine were much lower than AC. At SEN, reduction in the amino  
347 acids was most severe in Penjars with ~10-30 fold decrease in alanine, valine, leucine, and  
348 isoleucine. The levels of only a few amino acids such as glutamate at RR of Penjar-2,  
349 phenylalanine at RR and SEN of Penjar-3 and -4, and aspartate at SEN of Penjar-2 and -3  
350 were higher than AC at respective stages. All Penjar fruits had reduced level of serotonin (5-  
351 hydroxytryptamine) at SEN while serotonin levels were high in AC fruits throughout ripening  
352 and SEN.

### 353 **Penjars exhibit differential accumulation of sugars and cell wall-related metabolites**

354 During fruit ripening, glucose and fructose, cell wall-derived sugars, and polyols  
355 increase, while sucrose and sugar phosphates and fatty acids decrease (Fraser et al. 2007).  
356 Ripening Penjar fruits characteristically exhibited substantially higher levels of glucose,  
357 fructose, glucose-6-P, sucrose, etc. than AC (Fig. S15). At SEN glucose and fructose levels  
358 declined in Penjars but increased in AC. The Penjar fruits at SEN also showed increased  
359 levels of glucose-6-P, fructose-6-P, and mannose-6-P. At SEN, high levels of cell wall-  
360 related metabolites like xylose and cellobiose in AC fruits and reduced levels of  
361 galacturonate and galactarate levels was observed in Penjar fruits.

362 The profiles of other metabolites such as fatty acids, nucleotides, dehydroascorbate,  
363 nicotinate, and quinate in Penjar and AC fruits were also distinctly different (Fig. S16).  
364 Though the levels of fatty acids such as margaric acid, linolenic acid, stearic acid in Penjar  
365 fruits were similar to AC during ripening, at SEN their levels were higher in AC. The

366 metabolites- nonadecyclic acid and heneicosylic acid that are detected only at SEN were  
367 much lower in Penjars than AC. In contrast to Penjars, AC at SEN exhibited increased levels  
368 of adenosine and guanosine levels. Interestingly, uracil levels were high in Penjars  
369 throughout ripening including SEN except for Penjar-2 that had low levels at SEN.  
370



## 371 **Discussion**

372 Tomato being a perishable fruit is the subject of intensive investigations to extend its  
373 post-harvest shelf life (Pech et al. 2013). Among the regulatory factors identified, the *nor* and  
374 *rin* alleles in tomato prolong the shelf life of fruits, even in heterozygous condition (Garg et  
375 al. 2008a; Giovannoni, 2007). The *NOR* gene belongs to NAC transcription factor family  
376 (Klee and Giovannoni, 2011; Martel et al. 2011) and has only two reported mutant alleles, *alc*  
377 and *nor* in tomato (Casals et al. 2012; Dias et al. 2003; Garg et al. 2008a). In this study, we  
378 identified a novel allele in Penjar-1 with two mutations, one with Q13K and second, where a  
379 stop codon terminated the NOR protein after six aa, while the other three Penjar accessions  
380 had *alc* mutation. All four accessions showed extended fruit shelf-life during post-harvest  
381 storage, a phenotype consistent with reported *nor/alc* mutants (Casals et al. 2012).  
382 Considering that post-harvest shelf life of Penjars is dependent on genetic background, the  
383 same may have contributed to the observed differences in the shelf life of these accessions  
384 (Casals et al. 2012; Garg et al. 2008a,b). The 55 days delay in SEN compared to AC strongly  
385 indicates that post-harvest shelf life is considerably prolonged in the Penjar fruits.

386 In *nor/alc* mutant, the delayed onset or total loss of ripening signifies that the *NOR*  
387 gene regulates a majority of the ripening triggered processes (Casals et al. 2015; Osorio et al.  
388 2011; Saladié et al. 2007). Interestingly, despite mutations in *NOR* gene, the *RIN* expression  
389 was not considerably altered, except in Penjar-1, a total knockout mutant. Such a  
390 downregulation of *RIN* expression was also observed in *nor* and *SINAC4* RNAi lines (Martel,  
391 2010; Zhu et al. 2014). Evidently, though *RIN* is a master regulator, *NOR* acts autonomously  
392 of *RIN*, and optimal regulation of ripening requires a concerted action between these two  
393 regulators (Osorio et al. 2011).

394 A factor influencing fruit firmness is the cuticle as it prevents water loss and sustains  
395 cellular turgidity (Saladié et al. 2007). Consistent with earlier studies (Kosma et al. 2010;  
396 Saladié et al. 2007) the overall cuticle composition (wax and cutin) of Penjars is more similar  
397 to *nor/alc* mutants than AC. At the same time, the four Penjars widely vary in levels of  
398 different constituents of the cuticle. Only at MG, the Penjars share upregulation of few cuticle  
399 constituents and gene transcripts, whereas, at RR, such a shared regulation is largely absent.  
400 Surprisingly, post-MG despite variations in building blocks of the cuticle, all Penjars share  
401 prolonged shelf life and reduced water loss. Seemingly along with the composition, the  
402 cuticle architecture is also a key determinant of the prolonged shelf life of Penjars. The  
403 endogenous factors regulating cuticle composition/architecture are currently not known  
404 (Yeats and Rose, 2013; Fernández et al. 2016). It appears that the cuticle

405 composition/architecture is not the sole factor, and the regulation of shelf life also involves  
406 other cellular processes altered by *NOR* mutation in Penjars.

407 In addition to the cuticle, the cell wall is also considered a key determinant for  
408 retention of fruit firmness. Consistent with this, the silencing of several cell wall modifying  
409 enzymes in tomato extends the shelf life of fruits (Vicente et al. 2007). The prolonged post-  
410 harvest shelf life indicates that the process of cell wall dissolution is considerably slower in  
411 Penjar fruits. The presence of several NAC domains in the promoters of cell wall modifying  
412 genes suggests that mutations in *NOR* would lead to lowering of their expression. Consistent  
413 with this, the expression of most cell wall modifying genes is downregulated during ripening  
414 in Penjars similar to *nor/alc* mutants (Osorio et al. 2011; Saladié et al. 2007). Even at SEN,  
415 several of these genes showed reduced expression indicating slower degradation of the cell  
416 wall, which is also corroborated by lower levels of cell wall related metabolites in Penjars  
417 than in AC.

418 One of the characteristic features of *nor/alc* fruits is the reduced accumulation of  
419 carotenoids compared to normal ripening cultivars (Giovannoni, 2007; Kopeliovitch et al.  
420 1979; Sink Jr. et al. 1974). In Penjars, the reduction in carotenoids was manifested for most  
421 fruit-specific carotenoids including lycopene and  $\beta$ -carotene as well as for precursors,  
422 phytoene, and phytofluene. The reduced level of precursors is consistent with the lower  
423 expression of *PSYI* and *CYCB* in the Penjar fruits during ripening. In tomato fruits,  
424 carotenoid accumulation is also strongly influenced by ethylene; consequently *Nr* mutant of  
425 tomato shows diminished accumulation of carotenoids, due to a defect in ethylene perception  
426 (Barry et al. 2005). Similar to carotenoids, the reduction in ethylene emission from Penjars  
427 fruits was associated with lower expression of system II ethylene biosynthesis genes, *ACS2*,  
428 *ACS4* and *ACO1* (Barry and Giovannoni, 2007; Pech et al. 2012). The promoter analysis of  
429 carotenogenesis and ethylene biosynthesis genes revealed multiple NAC binding sites (Table  
430 S4) suggesting the downregulation of above genes may be related to the absence of a  
431 functional *NOR* protein in Penjars.

432 Current evidence indicate that fruit development is regulated by extensive interactions  
433 among different plant hormones (Kumar et al. 2014; Liu et al. 2015, Bodanapu et al. 2016).  
434 However, the overall hierarchical order of hormonal regulation in tomato development is not  
435 fully known. Hormonal profiling of Penjar fruits revealed that the *NOR* mutations influenced  
436 several hormones across the different developmental stages of fruits. In tomato, several  
437 studies have examined the influence of individual hormones on the accumulation of  
438 carotenoids (Kumar et al. 2014; Liu et al. 2015). However, a comprehensive correlation



439 between hormones and carotenoids is largely missing. Barring Penjar-4, the interactions  
440 between hormones and carotenoids were similar in other Penjars albeit with few differences.  
441 The similarity in hormone-carotenoids interactions indicates that though *NOR* mutation  
442 attenuates carotenoid accumulation in Penjars, it does not influence the process underlying  
443 above interactions. The different interaction profiles in Penjar-4 may owe to nearly steady  
444 JA levels at all ripening stages. Evidence from JA-deficient mutants has implied that JA  
445 influences carotenogenesis in tomato independent of ethylene (Liu et al. 2012). The hormone-  
446 carotenoid interactions also indicate that in addition to JA and ethylene, other hormones also  
447 influence the regulation of carotenogenesis in tomato.

448 In tomato, suppression of ethylene biosynthesis delays ripening of fruits and extends  
449 the shelf life (Oeller et al. 1991). Consistent with this, lower ethylene emission may have  
450 contributed to the prolonged shelf life of Penjar fruits. Also, lower ABA levels at MG and RR  
451 in Penjars can lead to slower ripening (Sun et al. 2012). The accumulation of ABA is also  
452 characteristic of plant cells that retain water (Iuchi et al. 2000; Wan and Li, 2006). The higher  
453 retention of water in Penjar fruits may be assisted by higher ABA levels observed at SEN in  
454 all Penjars. Consistent with this view, higher sugar levels in Penjars may help in retention of  
455 cellular turgidity as marked by slow water loss (Vicente et al. 2007). A similar correlation  
456 between sucrose levels and increased firmness was also observed in *LIN5* suppressed fruits  
457 (Vallarino et al. 2017).

458 The extension of shelf life of fruits demands an optimal utilization of stored resources.  
459 During post-harvest storage, the fruits are deprived of support from the mother plant and can  
460 stay fresh only by lowering metabolism. Consistent with this, Penjar fruits show reduced  
461 metabolic processes such as turnover of proteins, fatty acids and reduced flux via TCA cycle.  
462 The lowering of citrate and upregulation of malate indicates an attenuation of respiration that  
463 is critical for prolonging the shelf life (Centeno et al. 2011). Likewise, abundances of the  
464 aspartate amino acid family (methionine, isoleucine, threonine, and lysine) have been linked  
465 to energy metabolism during seed germination (Angelovici et al. 2011; Kirma et al. 2012).  
466 The downregulation of isoleucine, threonine observed in Penjars at SEN indicates reduced  
467 flux in TCA cycle. Increased lysine levels in Penjar-2 and -4 in SEN fruits was similar to that  
468 found in the fruits of *LeACS2* suppressed transgenic line (Gao et al. 2007). Lowering of  
469 metabolism was not restricted to respiration, but even protein turnover was reduced, as  
470 evident by the decrease in the levels of free amino acids in Penjars. The lowering of  
471 metabolism also requires a balance between carbon and nitrogen metabolism, which is  
472 consistent with a reduction in GABA levels in Penjars, as GABA acts as a regulatory

473 molecule to fine tune the cooperation between these two pathways (Takayama and Ezura,  
474 2015). Collectively, above metabolic shifts indicate attenuation of overall metabolism during  
475 ripening and post-harvest storage of Penjars, contributing to their long shelf life.

476 In summary, our study revealed a wide-ranging influence of *NOR* mutations on diverse  
477 metabolic processes in four different Penjars. The prolonged shelf life of Penjars appears to  
478 involve attenuation of several metabolic processes associated with slower degradation of cell  
479 walls. The sustenance of firmness seems to be correlated with higher sucrose and reduced  
480 water loss, and hitherto unknown features of cuticle composition/architecture in the Penjars.  
481 In future, a better comprehension of the metabolic processes including an understanding of  
482 cuticle architecture combined with genome editing of causative genes would facilitate the  
483 improvement of the shelf life of perishable fruits.

484

485

486

487

## 488 **Acknowledgements**

489 We thank Department of Biotechnology, Government of India  
490 (BT/PR11671/PBD/16/828/2008) funding to YS and RS, Council of Scientific and Industrial  
491 Research fellowship, New Delhi to RK and DST-Fund for Improvement of Science and  
492 Technology to Department of Plant Sciences. We thank Rafael Fernandez Muñoz, Institute  
493 for Mediterranean and Subtropical Horticulture, Malaga, Spain for the kind gift of Penjar  
494 accessions.

## 495 **Author contributions**

496 The work was conceptualized by RK and YS. Most experiments were done by RK  
497 and VT helped in the wax analysis. RK, RS, and YS were involved in writing the manuscript,  
498 and all authors read and approved the manuscript.

## 499 **Conflict of Interest**

500 The authors declare no conflict of interest.

## 501 **Supplementary data**

502 The following materials are available in the online version of this article.

503 **Figure S1.** Sequence analysis of *NAC-NOR* in Penjars.

504 **Figure S2.** Fruit phenotypes (A) and chronological development and ripening (B) in AC and  
505 Penjars.

506 **Figure S3.** The on-vine shelf life of Penjar and AC fruits.

507 **Figure S4.** Relative expression of *RIN* and *NOR* genes in AC and Penjar fruits.

508 **Figure S5.** Loss of fruit weight in both AC and Penjars after chloroform treatment (A) and  
509 the percent relative abundance of cuticular wax components in MG and RR fruits of AC and  
510 Penjars.

511 **Figure S6.** Relative expression of genes associated with cuticle biosynthesis in AC and  
512 Penjar fruits.

513 **Figure S7.** Location of putative NAC motifs in the promoters of cell wall modifying genes.

514 **Figure S8.** Ethylene emission and relative expression of ethylene biosynthetic genes in AC  
515 and Penjar fruits.

516 **Figure S9.** Carotenoid composition in AC and Penjar fruits during ripening and post-harvest  
517 storage.

518 **Figure S10.** Relative expression of key carotenoid biosynthesis genes in AC and Penjar  
519 fruits.

520 **Figure S11.** Correlation network of carotenoids, carotenogenic genes, and hormones during  
521 fruit ripening.

522 **Figure S12.** Principle component analysis (PCA) of metabolic profiles in AC and Penjar  
523 fruits.

524 **Figure S13.** The relative abundances of organic acids in the AC and Penjar fruits during  
525 ripening and post-harvest storage.

526 **Figure S14.** The relative abundances of amino acids and amines in the AC and Penjar fruits  
527 during ripening and post-harvest storage.

528 **Figure S15.** The relative abundances of sugars, sugar alcohols and sugar-derived acids in the  
529 AC and Penjar fruits during ripening and post-harvest storage.

530 **Figure S16.** The relative abundances of miscellaneous compounds (fatty acids, vitamins and  
531 vitamin-derivatives, nucleotides, phenolics, etc.) in the AC and Penjar fruits during ripening  
532 and post-harvest storage.

533 **Table S1.** Primers used for PCR in the present study.

534 **Table S2.** Carotenoid content in AC and Penjar fruits.

535 **Table S3.** The interactions between different metabolites and genes in the correlation  
536 networks of AC and Penjar fruits.

537 **Table S4.** List of NAC binding sites identified in the promoters of various genes.

538 **Table S5.** List of metabolites identified and their relative abundances in AC and Penjar fruits  
539 during ripening and post-harvest storage using GC-MS.

540 **Table S6.** List of cuticular wax components identified and their relative abundances in AC  
541 and Penjars during ripening using GC-MS.

542

543 **References**

- 544 **Alexander L, Grierson D.** 2002. Ethylene biosynthesis and action in tomato: a model for  
545 climacteric fruit ripening. *Journal of Experimental Botany*. 53, 2039–2055.
- 546 **Angelovici R, Fait A, Fernie AR, Galili G.** 2011. A seed high-lysine trait is negatively  
547 associated with the TCA cycle and slows down Arabidopsis seed germination. *New*  
548 *Phytologist*, 189, 148–159.
- 549 **Barry CS, Giovannoni JJ.** 2007. Ethylene and Fruit Ripening. *Journal of Plant Growth and*  
550 *Regulation* 26: 143–159.
- 551 **Barry CS, McQuinn RP, Thompson, AJ, Seymour GB, Grierson D, Giovannoni JJ.**  
552 2005. Ethylene insensitivity conferred by the *Green-ripe* and *Never-ripe 2* ripening  
553 mutants of tomato. *Plant Physiology* 138, 267–275.
- 554 **Bawono P, Heringa J.** 2014. Multiple Sequence Alignment Methods. *Methods in Molecular*  
555 *Biology* 1079, 245–62.
- 556 **Bodanapu R, Gupta SK, Basha PO, Sakthivel K, Sadhna S, Sreelakshmi, Y, Sharma R.**  
557 2016. Nitric oxide overproduction in tomato shr mutant shifts metabolic profiles and  
558 suppresses fruit growth and ripening. *Frontiers in Plant Science* 7, 1714.
- 559 **Brummell DA, Howie WJ, Ma C, Dunsmuir P.** 2002. Postharvest fruit quality of  
560 transgenic tomatoes suppressed in expression of a ripening-related *expansin*. *Postharvest*  
561 *Biology and Technology* 25, 209–220.
- 562 **Cantu D, Vicente AR, Greve LC, Labavitch JM, Powell ALT.** 2007. Genetic  
563 Determinants of Textural Modifications in Fruits and Role of Cell Wall Polysaccharides  
564 and Defense Proteins in the Protection Against Pathogens. *Fresh Prod.* 1(2), 101-110
- 565 **Carrari F, Baxter C, Usadel B, et al.** 2006. Integrated analysis of metabolite and transcript  
566 levels reveals the metabolic shifts that underlie tomato fruit development and highlight  
567 regulatory aspects of metabolic network behavior. *Plant Physiology* 142, 1380–96.
- 568 **Casals J, Pascual L, Cañizares J, Cebolla-Cornejo J, Casañas F, Nuez F.** 2012. Genetic  
569 basis of long shelf life and variability into Penjar tomato. *Genetic Resources and Crop*  
570 *Evolution* 59, 219–229.
- 571 **Casals J, Marti Renau R, Casañas Artigas F, Cebolla-Cornejo J.** 2015. Sugar and acid  
572 profile of Penjar tomatoes and its evolution during storage. *Scientia Agricola* 72, 314–  
573 321.
- 574 **Centeno DC, Osorio S, Nunes-Nesi A, et al.** 2011. Malate Plays a Crucial Role in Starch  
575 Metabolism, Ripening, and Soluble Solid Content of Tomato Fruit and Affects  
576 Postharvest Softening. *Plant Cell* 23, 162–184.

- 577 **Chow CN, Zheng HQ, Wu NY, Chien CH, Huang HD, Lee TY, Chiang-Hsieh YF, Hou**  
578 **PF, Yang TY, Chang WC.** 2016. PlantPAN 2.0: an update of plant promoter analysis  
579 navigator for reconstructing transcriptional regulatory networks in plants. *Nucleic Acids*  
580 *Research* 44, D1154-60.
- 581 **Dias T, Maluf W, Faria M, De Freitas J, Gomes L, Resende J, De Azevedo S.** 2003.  
582 *Alcobaça* allele and genotypic backgrounds affect yield and fruit shelf life of tomato  
583 hybrids. *Scientia Agricola* 60, 269–275.
- 584 **Ding CK, Wang CY.** 2003. The dual effects of methyl salicylate on ripening and expression  
585 of ethylene biosynthetic genes in tomato fruit. *Plant Science* 164, 589–596.
- 586 **Fernández V, Guzmán-Delgado P, Graça J, Santos S, Gil L.** (2016) Cuticle Structure in  
587 Relation to Chemical Composition: Re-assessing the Prevailing Model. *Frontiers in*  
588 *Plant Science* 7, 427.
- 589 **Fraser PD, Enfissi EMA, Halket JM, Truesdale MR, Yu D, Gerrish C, Bramley PM.**  
590 2007. Manipulation of Phytoene Levels in Tomato Fruit: Effects on Isoprenoids,  
591 Plastids, and Intermediary Metabolism. *Plant Cell* 19, 3194–3211.
- 592 **Gao HY, Zhu BZ, Zhu HL, Zhang YL, Xie YH, Li YC, Luo YB.** 2007. Effect of  
593 suppression of ethylene biosynthesis on flavor products in tomato fruits. *Russian*  
594 *Journal Plant Physiology* 54, 80–88.
- 595 **Garg N, Cheema DS, Dhatt AS.** 2008a. Utilization of *rin*, *nor*, and *alc* alleles to extend  
596 tomato fruit availability. *International Journal of Vegetable Science* 14, 41–54.
- 597 **Garg N, Cheema DS, Pathak D.** 2008b. Heterosis breeding in tomato involving *rin*, *nor* and  
598 *alc* alleles: A review of literature. *Advances in Horticultural Science* 22, 54–62.
- 599 **Giovannoni JJ.** 2001. Molecular biology of fruit maturation and ripening. *Annual Review of*  
600 *Plant Physiology and Plant Molecular Biology* 52, 725-749.
- 601 **Giovannoni JJ.** 2007. Fruit ripening mutants yield insights into ripening control. *Current*  
602 *Opinion in Plant Biology* 10, 283–289.
- 603 **Giovannoni JJ.** 2004. Genetic regulation of fruit development and ripening. *Plant Cell* 16  
604 Suppl, S170–S180.
- 605 **Gupta P, Sreelakshmi Y, Sharma R.** 2015. A rapid and sensitive method for determination  
606 of carotenoids in plant tissues by high performance liquid chromatography. *Plant*  
607 *Methods* 11, 5.
- 608 **Hirschberg J.** 2001. Carotenoid biosynthesis in flowering plants. *Current Opinion in Plant*  
609 *Biology* 4, 210–218.
- 610 **Iuchi S, Kobayashi M, Yamaguchi-Shinozaki K, Shinozaki K.** 2000. A stress-inducible

- 611 gene for 9-cis-epoxycarotenoid dioxygenase involved in abscisic acid biosynthesis under  
612 water stress in drought-tolerant cowpea. *Plant Physiology* 123, 553–62.
- 613 **Kilambi HV, Kumar, R, Sharma R, Sreelakshmi Y.** 2013. Chromoplast-Specific  
614 Carotenoid-Associated Protein Appears to Be Important for Enhanced Accumulation of  
615 Carotenoids in *hp1* Tomato Fruits. *Plant Physiology* 161:2085–2101.
- 616 **Kirma M, Araújo WL, Fernie AR, Galili G.** 2012. The multifaceted role of aspartate-  
617 family amino acids in plant metabolism. *Journal of Experimental Botany* 63, 4995–  
618 5001.
- 619 **Klee HJ, Giovannoni JJ.** 2011. Genetics and Control of Tomato Fruit Ripening and Quality  
620 Attributes. *Annual Reviews in Genetics* 45, 41–59.
- 621 **Kosma DK, Parsons EP, Isaacson T, Lü S, Rose JKC, Jenks MA.** 2010. Fruit cuticle lipid  
622 composition during development in tomato ripening mutants. *Physiology Plantarum*  
623 139, 107–117.
- 624 **Kopeliovitch E, Rabinowitch HD, Mizrahi Y, Kedar N.** 1979. The potential of ripening  
625 mutants for extending the storage life of the tomato fruit. *Euphytica* 28, 99–104.
- 626 **Kumar R, Khurana A, Sharma AK.** 2014. Role of plant hormones and their interplay in  
627 development and ripening of fleshy fruits. *Journal of Experimental Botany* 65, 4561–  
628 4575.
- 629 **Lim PO, Kim HJ, Nam HG.** 2007. Leaf senescence. *Annual Review of Plant Biology* 58,  
630 115–36.
- 631 **Leide J, Hildebrandt U, Reussing K, Riederer M, Vogg G.** 2007. The developmental  
632 pattern of tomato fruit wax accumulation and its impact on cuticular transpiration barrier  
633 properties: effects of a deficiency in a beta-ketoacyl-coenzyme A synthase (*LeCER6*).  
634 *Plant Physiology* 144, 1667–1679.
- 635 **Liu L, Wei J, Zhang M, Zhang L, Li C, Wang Q.** 2012. Ethylene independent induction of  
636 lycopene biosynthesis in tomato fruits by jasmonates. *Journal of Experimental Botany*  
637 63, 5751–5762.
- 638 **Liu M, Pirrello J, Chervin C, Roustan JP, Bouzayen M.** 2015. Ethylene Control of Fruit  
639 Ripening: Revisiting the Complex Network of Transcriptional Regulation. *Plant*  
640 *Physiology* 169, 2380–90.
- 641 **Ma N, Feng H, Meng X, Li D, Yang D, Wu C, Meng Q.** 2014. Overexpression of tomato  
642 *SINAC1* transcription factor alters fruit pigmentation and softening. *BMC Plant Biology*  
643 14, 351.
- 644 **Martel C.** 2010. Characterization Of The Roles Of *Rin* And *Nor* During Tomato (*Solanum*



- 645 *lycopersicum*) Fruit Ripening. Thesis submitted to Cornell University.  
646 <https://www.cornell.edu/>
- 647 **Martel C, Vrebalov J, Tafelmeyer P, Giovannoni JJ.** 2011. The Tomato MADS-Box  
648 Transcription Factor RIPENING INHIBITOR Interacts with Promoters Involved in  
649 Numerous Ripening Processes in a COLORLESS NONRIPENING-Dependent Manner.  
650 *Plant Physiology* 157, 1568–1579.
- 651 **McAtee P, Karim S, Schaffer R, David K.** 2013. A dynamic interplay between  
652 phytohormones is required for fruit development, maturation, and ripening. *Frontiers in*  
653 *Plant Science* 4, 79.
- 654 **Meli VS, Ghosh S, Prabha TN, Chakraborty N, Chakraborty S, Datta A.** 2010.  
655 Enhancement of fruit shelf life by suppressing N-glycan processing enzymes.  
656 *Proceedings of National Academy of Sciences, U. S. A.* 107, 2413–2418.
- 657 **Mutschler M, Guttieri M, Kinzer S, Grierson D, Tucker G.** 1988. Changes in ripening-  
658 related processes in tomato conditioned by the *alc* mutant. *Theoretical and Applied*  
659 *Genetics* 76, 285–292.
- 660 **Mutschler M, Wolfe DW, Cobb ED, Yourstone KS.** 1992. Tomato Fruit Quality and Shelf  
661 Life in Hybrids Heterozygous for the *alc* Ripening Mutant. *Horticultural Science* 27,  
662 1985–1988.
- 663 **Nambeesan S, Datsenka T, Ferruzzi MG, Malladi A, Mattoo AK, Handa AK.** 2010.  
664 Overexpression of yeast spermidine synthase impacts ripening, senescence and decay  
665 symptoms in tomato. *The Plant Journal* 63, 836–847.
- 666 **Ng PC, Henikoff S.** 2003. SIFT: Predicting amino acid changes that affect protein function.  
667 *Nucleic Acids Research* 31, 3812–3814.
- 668 **Oeller PW, Lu MW, Taylor LP, Pike DA, Theologis A.** 1991. Reversible inhibition of  
669 tomato fruit senescence by antisense RNA. *Science* 254, 437–439.
- 670 **Osman SF, Gerard HC, Fett WF, Moreau R, Dudley RL.** 1995. Method for the  
671 Production and Characterization of Tomato Cutin Oligomers. *Journal of Agriculture and*  
672 *Food Chemistry* 43, 2134–2137.
- 673 **Osorio S, Alba R, Damasceno CMB, et al.** 2011. Systems Biology of Tomato Fruit  
674 Development: Combined Transcript, Protein, and Metabolite Analysis of Tomato  
675 Transcription Factor (*nor*, *rin*) and Ethylene Receptor (*Nr*) Mutants Reveals Novel  
676 Regulatory Interactions. *Plant Physiology* 157, 405–425.
- 677 **Pech JC, Purgatto E, Bouzayen M, Latché A.** 2012. Ethylene and Fruit Ripening, *Annual*  
678 *Plant Reviews* 44, 275-304.



- 679 **Pech JC, Purgatto E, Girardi CL, Rombaldi CV, Latché A.** 2013. Current challenges in  
680 postharvest biology of fruit ripening. *Current Agricultural Science and Technology* 19,  
681 1–18.
- 682 **Pirrello J.** 2009. Regulation of tomato fruit ripening. *CAB Reviews Perspectives in*  
683 *Agriculture Veterinary Science Nutrition and Natural Resources* 4, 1–14.
- 684 **Saladié M, Matas AJ, Isaacson T, et al.** 2007. A reevaluation of the key factors that  
685 influence tomato fruit softening and integrity. *Plant Physiology* 144, 1012–28.
- 686 **Seymour GB, Chapman NH, Chew BL, Rose JKC.** 2013. Regulation of ripening and  
687 opportunities for control in tomato and other fruits. *Plant Biotechnology Journal* 11,  
688 269–278.
- 689 **Shannon P, Markiel A, Ozier O, Baliga NS, Wang JT, Ramage D, Amin N, Schwikowski**  
690 **B, Ideker T.** 2003. Cytoscape: A software Environment for integrated models of  
691 biomolecular interaction networks. *Genome Research* 13, 2498–2504.
- 692 **Sim NL, Kumar P, Hu J, Henikoff S, Schneider G, Ng PC.** 2012. SIFT web server:  
693 predicting effects of amino acid substitutions on proteins. *Nucleic Acids Research* 40,  
694 W452-7.
- 695 **Simpson DJ, Baqar AMR, Mcglasson AWB, Leea TH.** 1976. Changes in Ultrastructure  
696 and Pigment Content during Development and Senescence of Fruits of Normal and *rin*  
697 and *nor* Mutant Tomatoes. *Australian Journal of Plant Physiology* 3(5), 575-587
- 698 **Sink Jr, KC, Herner RC, Knowlton LL.** 1974. Chlorophyll and carotenoids of the *rin*  
699 tomato mutant. *Canadian Journal of Botany* 52, 1657–1660.
- 700 **Sun L, Sun Y, Zhang M, et al.** 2012. Suppression of *9-cis-epoxycarotenoid dioxygenase*,  
701 which encodes a key enzyme in abscisic acid biosynthesis, alters fruit texture in  
702 transgenic tomato. *Plant Physiology* 158, 283–298.
- 703 **Takayama M, Ezura H.** 2015. How and why does tomato accumulate a large amount of  
704 GABA in the fruit? *Frontiers in Plant Science* 6, 1–7.
- 705 **Tieman D, Taylor M, Ciardi J, Klee H.** 2000. The tomato ethylene receptors NR and  
706 LeETR4 are negative regulators of ethylene response and exhibit functional  
707 compensation within a multigene family. *Proceedings of National Academy of Science,*  
708 *U. S. A.* 97, 5663–5668.
- 709 **Uluşik S, Chapman NH, Smith R, Poole M, Adams G, Gillis RB, Besong TMD, et al.**  
710 2016. Genetic improvement of tomato by targeted control of fruit softening. *Nature*  
711 *Biotechnology* 34, 950–952.
- 712 **Vallarino JG, Yeats TH, Maximova E, Rose JK, Fernie AR, Osorio S.** 2017. Postharvest

- 713 changes in LIN5-down-regulated plants suggest a role for sugar deficiency in cuticle  
714 metabolism during ripening. *Phytochemistry* 142, 11-20.
- 715 **Verwoerd TC, Dekker BMM, Hoekema A.** 1989. A small-scale procedure for the rapid  
716 isolation of plant RNAs. *Nucleic Acids Research* 17, 2362.
- 717 **Vicente AR, Saladié M, Rose JKC, Labavitch JM.** 2007. The linkage between cell wall  
718 metabolism and fruit softening: Looking to the future. *Journal of the Science of Food*  
719 *and Agriculture* 87, 1435–1448.
- 720 **Wan XR, Li L.** 2006. Regulation of ABA level and water-stress tolerance of Arabidopsis by  
721 ectopic expression of a peanut *9-cis-epoxycarotenoid dioxygenase* gene. *Biochem.*  
722 *Biophys. Res. Commun.* 347(4), 1030–1038.
- 723 **Xie Y, Zhu B, Yang X, Zhang H, Fu D, Zhu H, Shao Y, Li Y, Gao H, Luo Y.** 2006. Delay  
724 of postharvest ripening and senescence of tomato fruit through virus-induced *LeACS2*  
725 gene silencing. *Postharvest Biology and Technology* 42, 8–15.
- 726 **Yeats TH, Rose JKC.** 2013. The formation and function of plant cuticles. *Plant Physiology*  
727 163, 5–20
- 728 **Zhu M, Chen G, Zhou S, Tu Y, Wang Y, Dong T, Hu Z.** 2014. A new tomato NAC (NAM  
729 ATAF1/2/CUC2) transcription factor, SINAC4, functions as a positive regulator of fruit  
730 ripening and carotenoid accumulation. *Plant Cell Physiology* 55, 119–135.
- 731
- 732

733 **Figure legends**

734

735 **Figure 1. Mutations in NAC-NOR gene in *nor*, *alcobaca* and Penjar accessions.** AC  
736 encodes a full-length NOR protein of 355 aa. *nor* mutant produces a truncated protein of 186  
737 aa. The Penjar-1 encodes a protein of 6 aa length, whereas *alc*, Penjar-2, -3, and -4 encode a  
738 full-length protein with a single amino acid change of V to D at 106<sup>th</sup> position (indicated by  
739 an asterisk and red band). NAC indicates NAC domain and TRR indicates transcriptional  
740 regulatory region. The details of base changes and the corresponding positions in the cDNA,  
741 protein, and SIFT score are indicated in the Table.

742 **Figure 2. Post-harvest shelf life and water loss in AC and Penjar fruits.** **A**, The fruits  
743 were harvested at ripe stage and incubated under normal day-night conditions as described in  
744 methods. By 40 days post-harvest, AC fruits showed prominent wrinkling, and 65 day-old  
745 fruits displayed a clear sign of cellular disintegration. **B**, The water loss was measured during  
746 post-harvest storage. Data are means of 5 biological replicates  $\pm$  SE, ‘\*’ indicates  $P \leq 0.05$ .

747 **Figure 3. The cuticular wax composition of AC and Penjar fruits during ripening.** **A**,  
748 The fruits were harvested at the ripe stage, and cuticular wax from the surface of both AC and  
749 Penjar fruits was removed by using chloroform. This resulted in the severe shrinking of fruits  
750 due to loss of moisture. **B**, The total cuticular wax content of AC and Penjar fruits at MG and  
751 RR. **C-F**, The relative abundance of cuticular wax components: alkanes (**C**), fatty acids (**D**),  
752 fatty alcohols (**E**), sterols and triterpenes (**F**) in MG and RR fruits of AC and Penjars. Data  
753 are means of 3 biological replicates  $\pm$  SE, ‘\*’ indicates  $P \leq 0.05$ .

754 **Figure 4. Relative expression of cell wall modifying genes in AC and Penjar fruits.** The  
755 fruits were collected at different ripening and SEN stages, and expression of various cell wall  
756 modifying genes was determined by qPCR. The graphs represent the data obtained after  
757 normalization with *actin* and *ubiquitin*. **A**,  $\alpha$ -Galactosidase; **B**,  $\beta$ -Galactosidase; **C**,  $\alpha$ -  
758 Mannosidase; **D**,  $\beta$ -Mannosidase; **E**, Polygalacturonase 2A; **F**, Polygalacturonase  $\beta$  subunit;  
759 **G**, Pectin methylesterase; **H**, Expansin; **I**, Deoxyhypusine synthase and **J**,  $\beta$ -N-acetyl-D-  
760 hexosaminidase. Data are means of 3 biological replicates  $\pm$  SE, ‘\*’ indicates  $P \leq 0.05$ .

761 **Figure 5. Hormone profiling in AC and Penjar fruits.** The fruits were collected at different  
762 ripening and SEN stages, and hormone profiles were determined as described in methods. **A**,  
763 IAA; **B**, IBA; **C**, zeatin; **D**, JA; **E**, MeJA; **F**, SA; **G**, ABA. Data are means of 5 biological  
764 replicates  $\pm$  SE, ‘\*’ indicates  $P \leq 0.05$ .

765

766

767 **Figure 6. The metabolic shifts in the fruits of Penjars in comparison to AC during**  
768 **ripening and post-harvest storage.** The relative abundances of the metabolites in Penjar  
769 fruits at MG, BR, RR and SEN stages were obtained from the  $\text{Log}_2$  Penjar/AC values, and  
770 only those metabolites with  $\geq 1.5$  fold change ( $n=5 \pm \text{SE}$ ,  $P \leq 0.05$ ) were mapped on the  
771 pathway. The scale at the top left corner represents  $\text{Log}_2$  fold changes in the range of -3 to +3.  
772 The metabolites indicated in gray letters on the pathway were not detected in the GC-MS  
773 analysis.

774

Table 1. List of compounds identified in the cutin matrix of MG and RR stage fruits of AC and Penjars.

| Compound                          | MG                    |                        |         |                         |         |                         |         |                         |         |
|-----------------------------------|-----------------------|------------------------|---------|-------------------------|---------|-------------------------|---------|-------------------------|---------|
|                                   | AC                    | Penjar-1               |         | Penjar-2                |         | Penjar-3                |         | Penjar-4                |         |
|                                   | Mean ± SE             | Mean ± SE              | P-value | Mean ± SE               | P-value | Mean ± SE               | P-value | Mean ± SE               | P-value |
| Glycerol                          | 1.18 ± 0.28           | <b>29.06 ± 1.89</b>    | 0.0005  | <b>6.85 ± 0.50</b>      | 0.0157  | <b>12.41 ± 0.23</b>     | 0.0001  | <b>54.86 ± 7.72</b>     | 0.0196  |
| Dodecanoic acid                   | 3.39 ± 0.23           | <b>39.10 ± 4.03</b>    | 0.0045  | 5.77 ± 0.40             | 0.0106  | 4.87 ± 0.41             | 0.0759  | <b>9.58 ± 0.23</b>      | 0.0002  |
| Hexadecanoic acid                 | 37.63 ± 4.55          | <b>264.38 ± 14.89</b>  | 0.0211  | 56.61 ± 4.32            | 0.0006  | 3.62 ± 0.08             | 0.5516  | <b>79.28 ± 3.72</b>     | 0.0139  |
| Heptadecanoic acid                | 2.90 ± 0.15           | <b>17.72 ± 1.66</b>    | 0.0547  | <i>1.56 ± 0.06</i>      | 0.0001  | <b>11.30 ± 0.25</b>     | 0.0001  | <b>4.48 ± 0.20</b>      | 0.0889  |
| Octadecanol                       | 10.90 ± 1.38          | <i>5.66 ± 0.81</i>     | 0.0184  | <i>2.45 ± 0.06</i>      | 0.0184  | 7.60 ± 0.73             | 0.0090  | <b>39.81 ± 1.26</b>     | 0.0003  |
| hydroxy hexadecanoic acid         | 25.03 ± 2.01          | <b>217.18 ± 3.19</b>   | 0.0002  | <b>47.90 ± 4.67</b>     | 0.0223  | <b>70.95 ± 7.42</b>     | 0.0326  | <b>153.82 ± 2.83</b>    | 0.0004  |
| 9(10),16-diOH hexadecanoic        | 442.17 ± 42.61        | <i>8.31 ± 1.04</i>     | 0.0086  | <i>9.43 ± 0.54</i>      | 0.0002  | <b>847.69 ± 72.10</b>   | 0.0318  | <b>731.33 ± 55.32</b>   | 0.0006  |
| Octadecanoic acid                 | 57.51 ± 4.66          | <b>355.26 ± 19.42</b>  | 0.0002  | <b>88.28 ± 1.81</b>     | 0.1982  | <b>123.74 ± 4.33</b>    | 0.0264  | <b>103.68 ± 1.65</b>    | 0.0005  |
| 18-OH octadecanoic                | 28.39 ± 4.66          | <b>312.40 ± 9.685</b>  | 0.0014  | <b>90.59 ± 6.41</b>     | 0.0094  | <b>77.22 ± 5.63</b>     | 0.0178  | <b>167.78 ± 4.07</b>    | 0.0004  |
| 9,18-diOH octadecanoic            | 15.09 ± 1.12          | <b>168.98 ± 12.04</b>  | 0.0092  | <b>25.96 ± 0.87</b>     | 0.0210  | <b>44.29 ± 3.66</b>     | 0.7018  | <b>54.91 ± 2.72</b>     | 0.0002  |
| Docosanoic acid                   | 0 ± 0                 | 0 ± 0                  | 0.0000  | 0 ± 0                   | 0.0000  | 0 ± 0                   | 0.0000  | 0 ± 0                   | 0.0000  |
| Tetracosanoic acid                | 0 ± 0                 | 0 ± 0                  | 0.0000  | 0 ± 0                   | 0.0000  | 0 ± 0                   | 0.0000  | <b>8.79 ± 0.36</b>      | 0.0017  |
| <b>TOTAL (µg cm<sup>-2</sup>)</b> | <b>624.22 ± 59.39</b> | <b>1418.10 ± 68.69</b> |         | <b>335.43 ± 19.69</b>   |         | <b>1272.24 ± 98.40</b>  |         | <b>1408.37 ± 80.13</b>  |         |
| Compound                          | RR                    |                        |         |                         |         |                         |         |                         |         |
|                                   | AC                    | Penjar-1               |         | Penjar-2                |         | Penjar-3                |         | Penjar-4                |         |
|                                   | Mean ± SE             | Mean ± SE              | P-value | Mean ± SE               | P-value | Mean ± SE               | P-value | Mean ± SE               | P-value |
| Glycerol                          | 2.25 ± 0.27           | <b>8.55 ± 0.45</b>     | 0.0017  | <b>8.55 ± 0.90</b>      | 0.0053  | <b>9.45 ± 1.35</b>      | 0.0304  | <b>432.45 ± 59.41</b>   | 0.0030  |
| Dodecanoic acid                   | 6.34 ± 0.45           | <b>19.35 ± 1.82</b>    | 0.0159  | 6.30 ± 0.45             | 0.0194  | <i>1.80 ± 0.16</i>      | 0.0004  | <b>27.47 ± 2.25</b>     | 0.0017  |
| Hexadecanoic acid                 | 33.75 ± 2.25          | <b>132.75 ± 5.43</b>   | 0.0005  | <b>60.75 ± 6.75</b>     | 0.0701  | 30.67 ± 3.24            | 0.5778  | <b>114.35 ± 5.85</b>    | 0.0006  |
| Heptadecanoic acid                | 14.62 ± 0.981         | <i>4.52 ± 0.45</i>     | 0.0046  | <i>1.80 ± 0.135</i>     | 0.0047  | <i>1.85 ± 0.24</i>      | 0.0049  | 13.95 ± 1.84            | 0.0007  |
| Octadecanol                       | 18.17 ± 0.96          | <i>2.70 ± 0.35</i>     | 0.0028  | 20.72 ± 1.35            | 0.0312  | <b>36.93 ± 3.6</b>      | 0.0055  | <b>141.75 ± 19.08</b>   | 0.0077  |
| hydroxy hexadecanoic acid         | 28.35 ± 2.25          | <b>102.15 ± 12.6</b>   | 0.0010  | <b>46.35 ± 5.40</b>     | 0.5663  | 27.45 ± 2.25            | 0.9869  | <b>185.85 ± 17.14</b>   | 0.0041  |
| 9(10),16-diOH hexadecanoic        | 613.35 ± 60.32        | <i>45.91 ± 2.25</i>    | 0.0005  | 842.85 ± 118.80         | 0.0654  | <b>1683.22 ± 192.15</b> | 0.0034  | <b>2753.55 ± 239.45</b> | 0.0021  |
| Octadecanoic acid                 | 12.61 ± 1.35          | <b>54.94 ± 5.71</b>    | 0.0504  | <b>21.62 ± 2.25</b>     | 0.1170  | 9.94 ± 0.45             | 0.1027  | <b>119.76 ± 16.65</b>   | 0.0003  |
| 18-OH octadecanoic                | 54.92 ± 5.85          | <b>219.61 ± 28.8</b>   | 0.0040  | <b>91.35 ± 17.59</b>    | 0.4278  | 47.73 ± 6.3             | 0.2023  | <b>197.55 ± 32.4</b>    | 0.0002  |
| 9,18-diOH octadecanoic            | 33.37 ± 2.25          | <b>145.87 ± 25.20</b>  | 0.0027  | 44.17 ± 3.55            | 0.0732  | 40.05 ± 4.5             | 0.9738  | <b>181.86 ± 25.65</b>   | 0.0019  |
| Docosanoic acid                   | 0 ± 0                 | 0 ± 0                  | 0.0000  | 0 ± 0                   | 0.0000  | <b>1.35 ± 0.20</b>      | 0.0090  | <b>18.91 ± 2.92</b>     | 0.0007  |
| Tetracosanoic acid                | 0 ± 0                 | 0 ± 0                  | 0.0000  | 0 ± 0                   | 0.0000  | 0 ± 0                   | 0.0000  | <b>47.07 ± 19.81</b>    | 0.1389  |
| <b>TOTAL (µg cm<sup>-2</sup>)</b> | <b>817.42 ± 76.85</b> | <b>736.21 ± 83.11</b>  |         | <b>1144.35 ± 157.18</b> |         | <b>1890 ± 214.45</b>    |         | <b>4234.05 ± 442.35</b> |         |

The values highlighted in bold and italics represent ≥1.5 fold increase or decrease respectively in Penjars compared to AC.

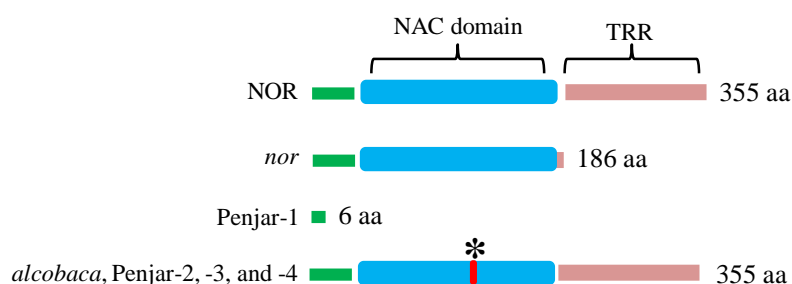

| Penjar accessions | SNP position (cDNA) | Base change | SIFT Score (deleterious $\leq 0.05$ ) | Amino acid change and position | Protein length (aa) |
|-------------------|---------------------|-------------|---------------------------------------|--------------------------------|---------------------|
| Penjar-1          | 20                  | C to A      | Stop codon, deleterious               | Stop codon                     | 6                   |
|                   | 37                  | C to A      | 0.15, tolerable                       | Q to K, 13 <sup>th</sup>       |                     |
| Penjar-2          | 316                 | T to A      | 0.0, deleterious                      | V to D, 106 <sup>th</sup>      | 355                 |
| Penjar-3          | 316                 | T to A      | 0.0, deleterious                      | V to D, 106 <sup>th</sup>      | 355                 |
| Penjar-4          | 316                 | T to A      | 0.0, deleterious                      | V to D, 106 <sup>th</sup>      | 355                 |

**Figure 1. Mutations in NAC-NOR in *nor*, *alcobaca* and Penjar accessions.** AC encodes a full length NOR protein of 355 aa. *nor* mutant produces a truncated protein of 186 aa. The Penjar-1 encodes a protein of 6 aa length, whereas *alcobaca*, Penjar-2, -3, and -4 encode a full length protein with a single amino acid change of V to D at 106<sup>th</sup> position (indicated by an asterisk and red band). NAC indicates NAC domain and TRR indicates transcriptional regulatory region. The details of base changes and the corresponding positions in the cDNA, protein, and SIFT score are indicated in the Table.

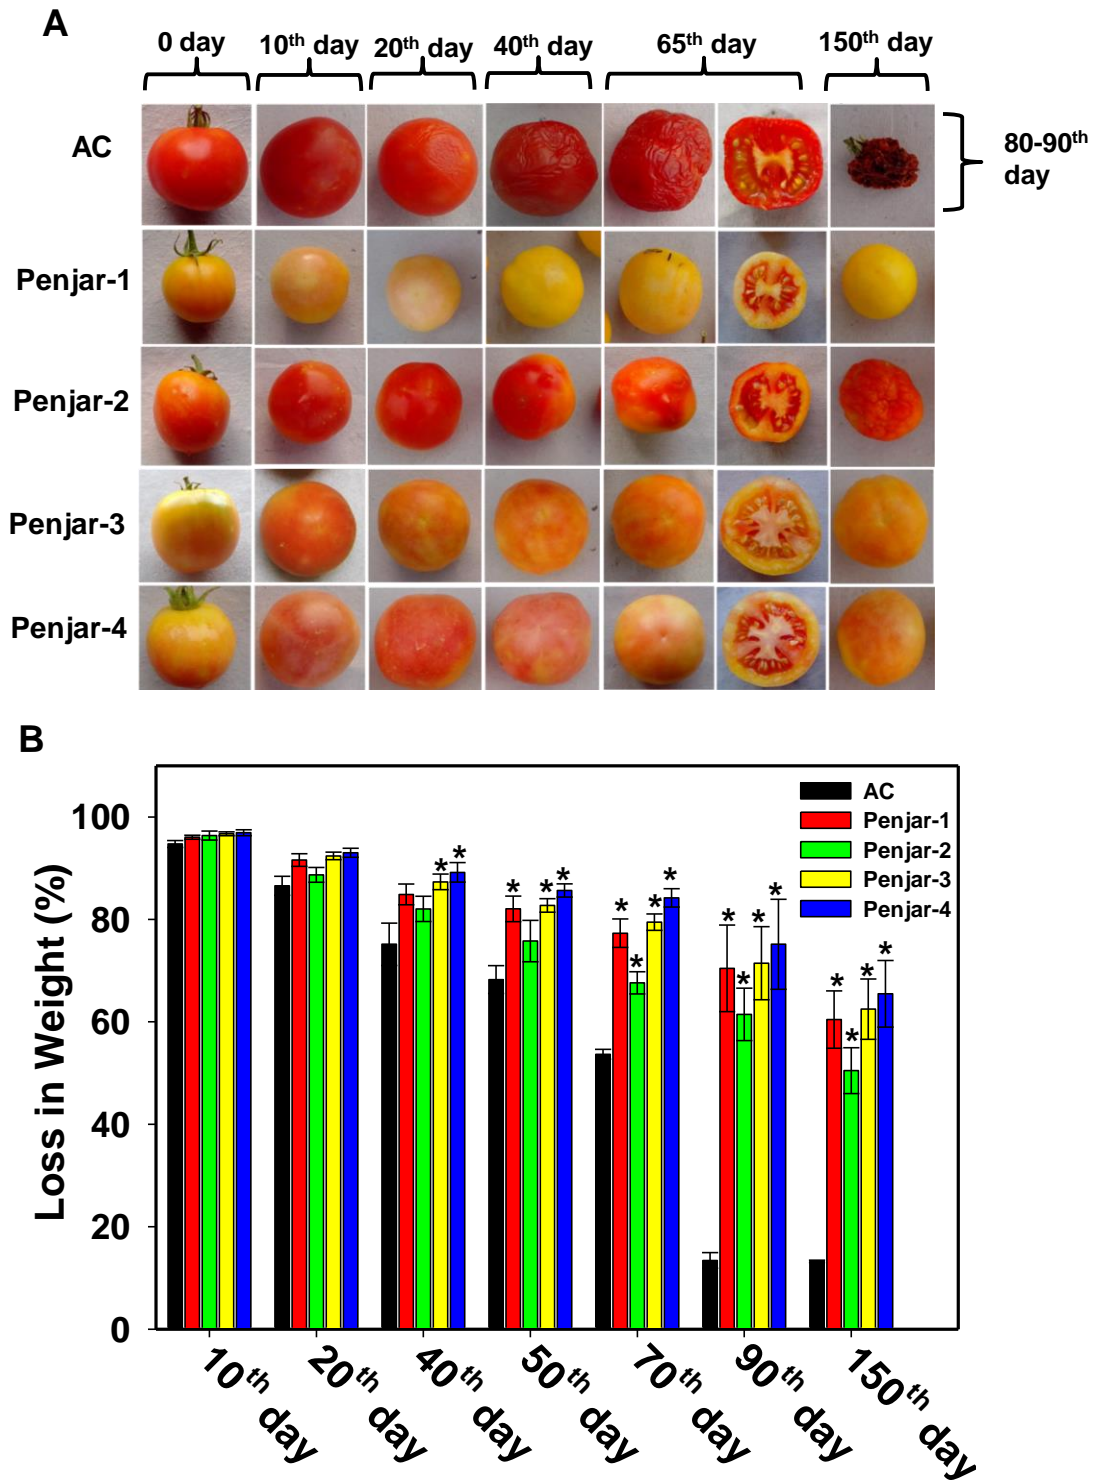

**Figure 2. Post-harvest shelf life and water loss in AC and Penjar fruits.** A, The AC and Penjar fruits were harvested at ripe stage and incubated under normal day-night conditions as described in methods. By 40 days post-harvest, WT fruits showed prominent wrinkling, and 65 day-old fruits displayed a clear sign of cellular disintegration. B, The water loss was measured during post-harvest storage. Data are means of 5 biological replicates  $\pm$  SE, ‘\*’ indicates  $P \leq 0.05$ .



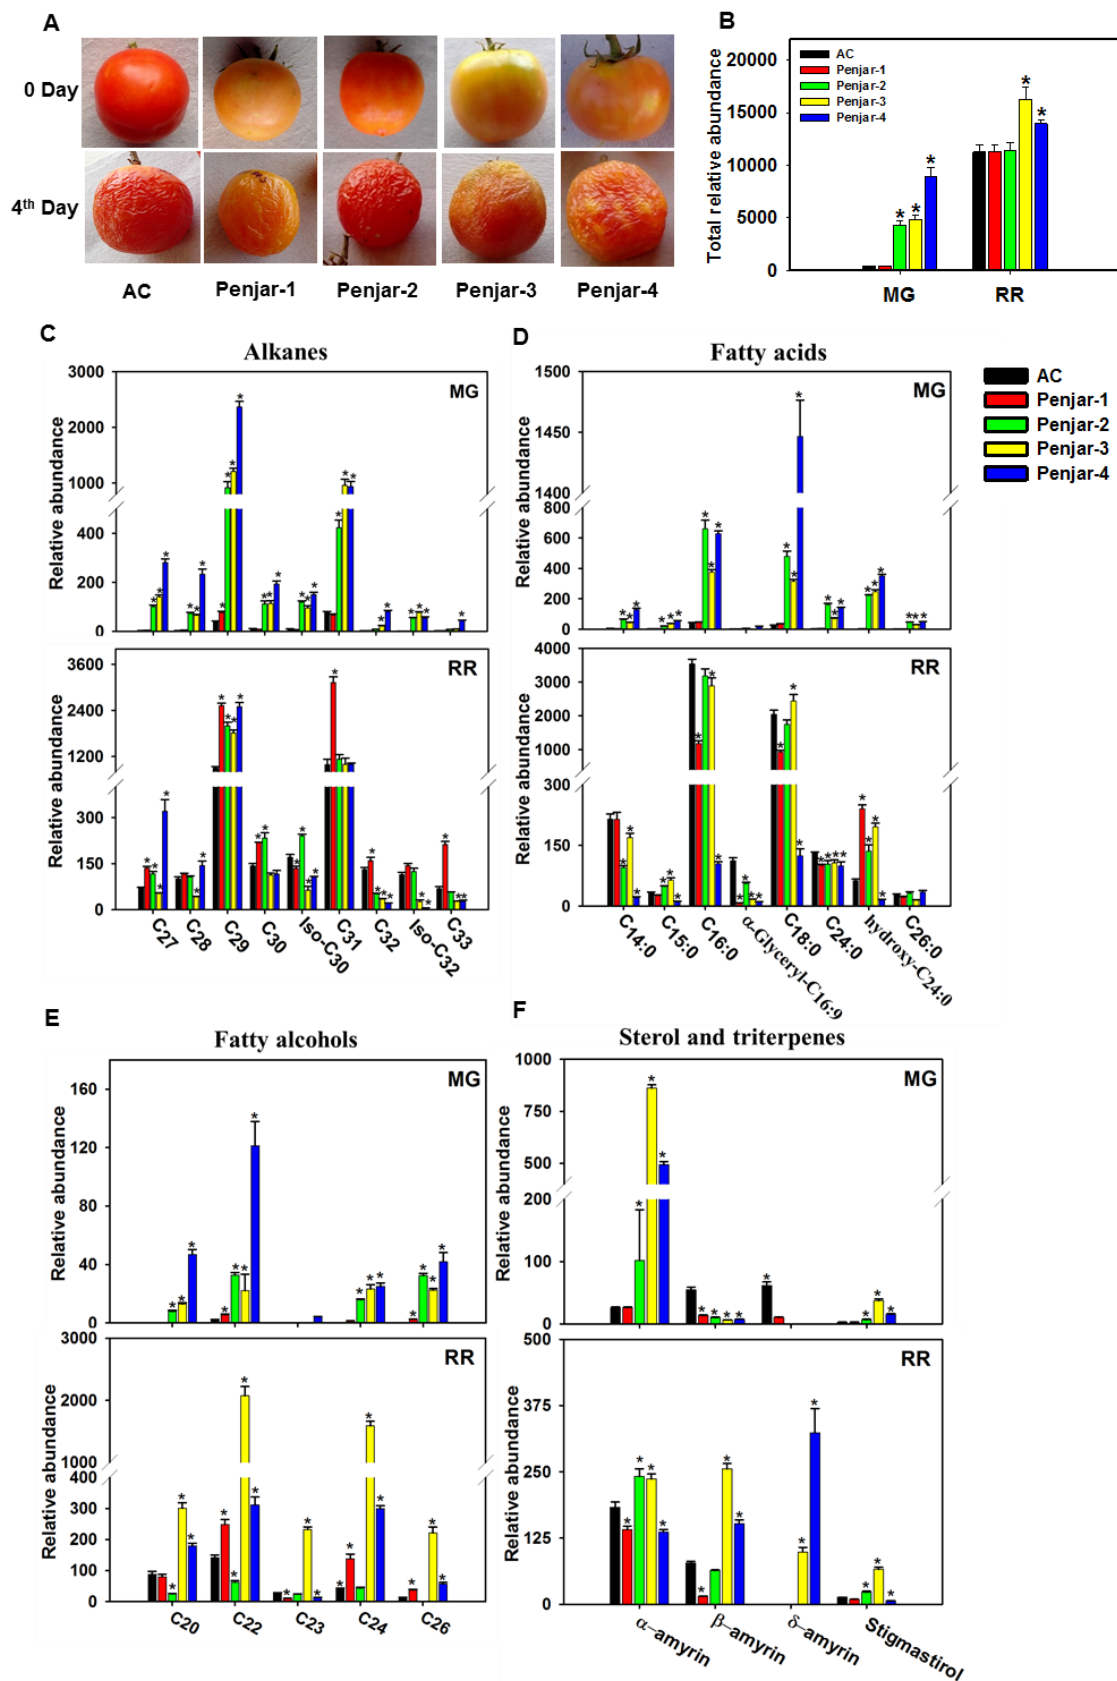



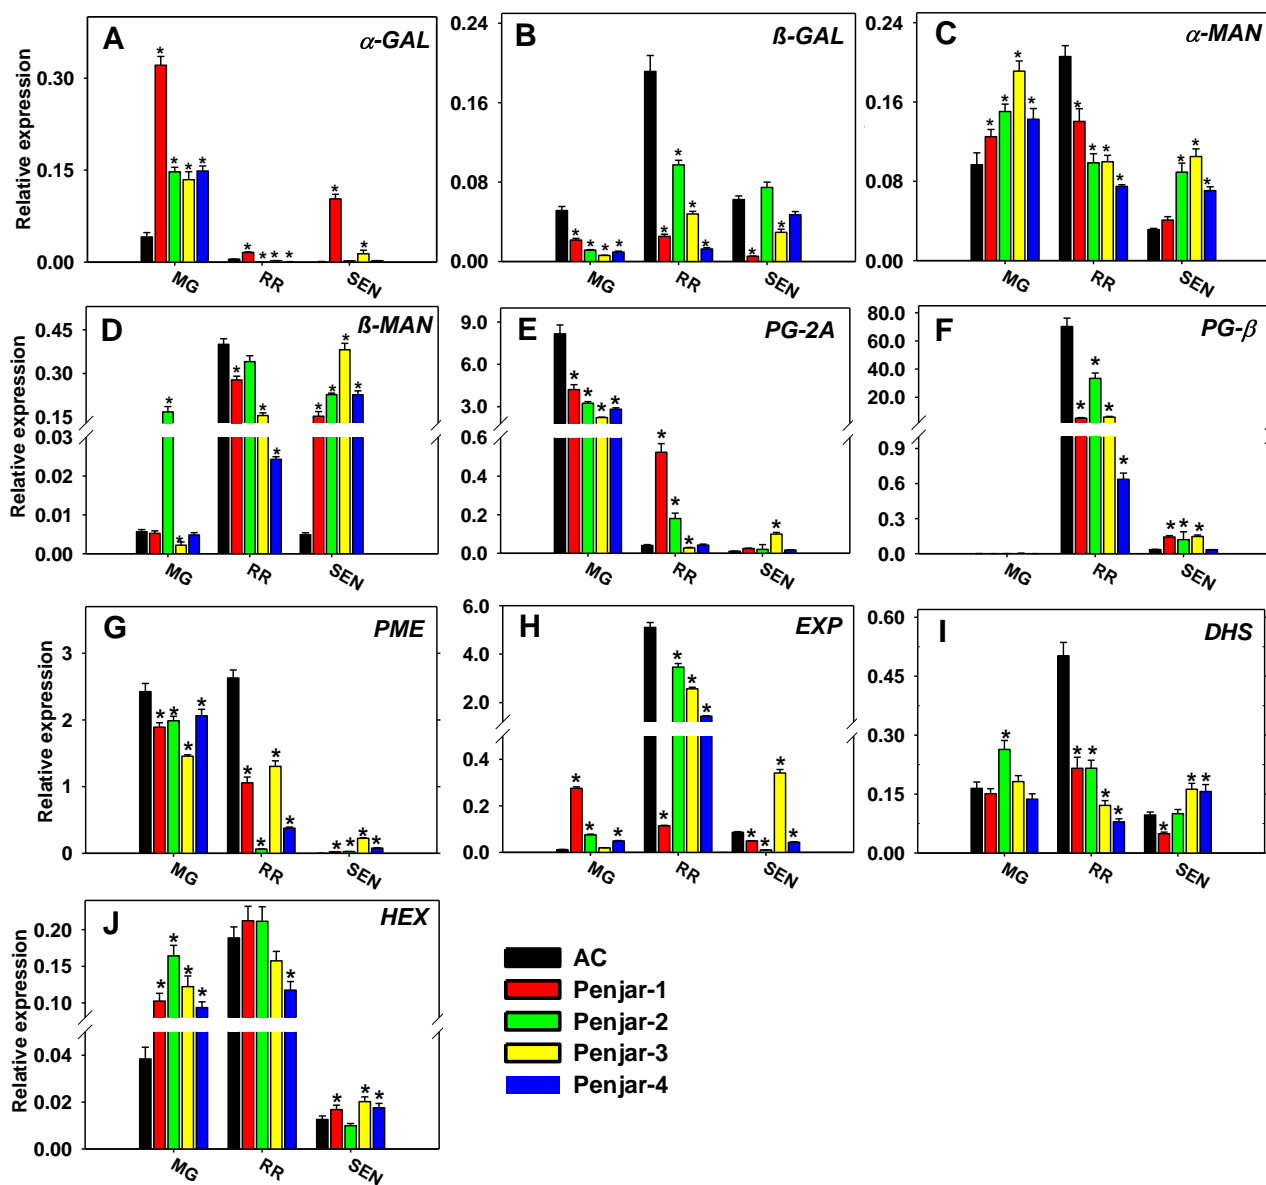

**Figure 4. Relative expression of cell wall modifying genes in AC and Penjar fruits.** The fruits of AC and Penjars were collected at different ripening and SEN stages and expression of various cell wall modifying genes was determined by qPCR. The graphs represent the data obtained after normalization with *actin* and *ubiquitin*. **A**,  $\alpha$ -Galactosidase, **B**,  $\beta$ -Galactosidase, **C**,  $\alpha$ -Mannosidase, **D**,  $\beta$ -Mannosidase, **E**, Polygalacturonase 2A, **F**, Polygalacturonase  $\beta$  subunit, **G**, Pectinesterase, **H**, Expansin, **I**, Deoxyhypusine synthase and **J**,  $\beta$ -N-acetyl-D-hexosaminidase. Data are means of 3 biological replicates  $\pm$  SE, ‘\*’ indicates  $P \leq 0.05$ .

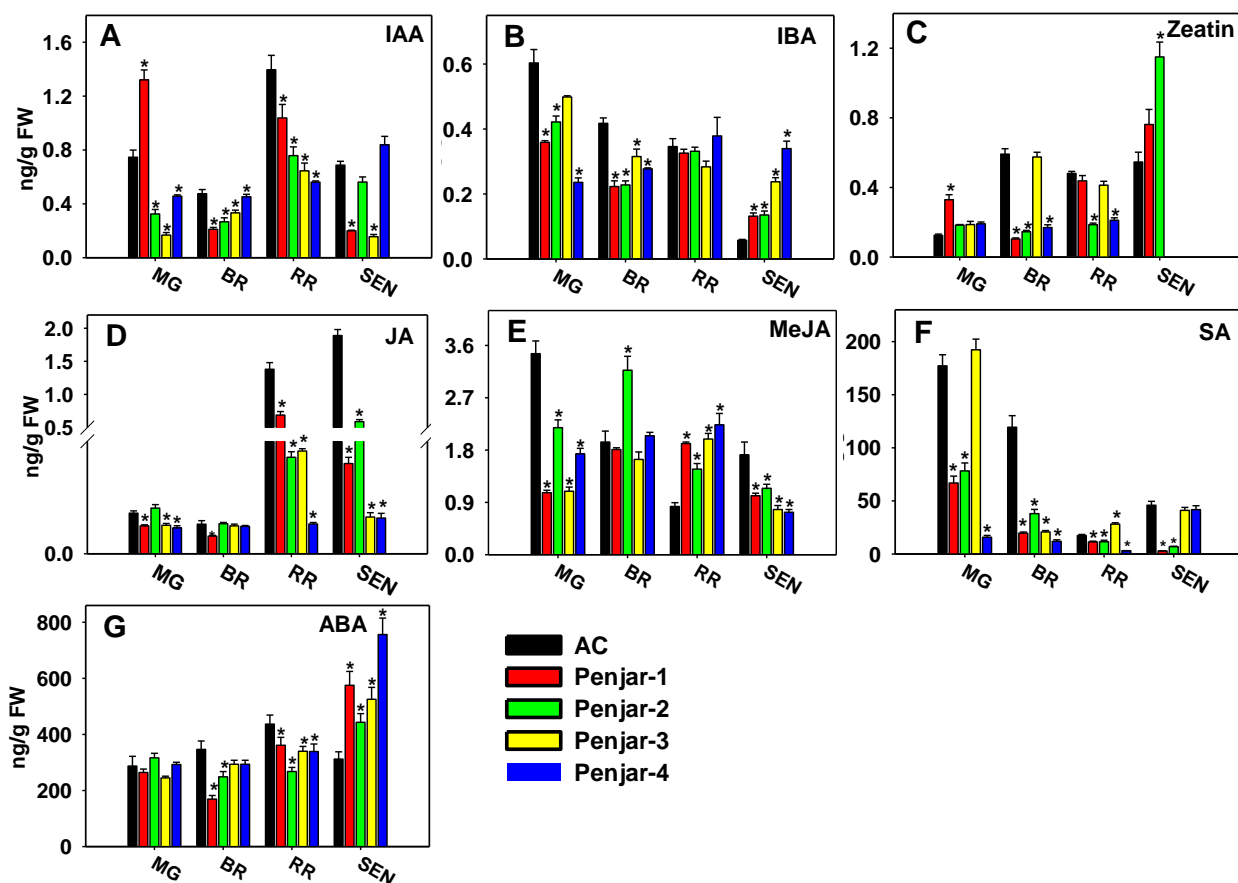

**Figure 5. Hormone profiling in AC and Penjar fruits.** The fruits of AC and Penjars were collected at different ripening and SEN stages and hormone profiles were determined as described in methods. **A**, IAA, indole-3-acetic acid; **B**, IBA, indole-3-butyric acid; **C**, zeatin, **D**, JA, jasmonic acid; **E**, MeJA, methyl jasmonate; **F**, SA, salicylic acid; **G**, ABA, abscisic acid. Data are means of 5 biological replicates  $\pm$  SE, ‘\*’ indicates  $P \leq 0.05$ .

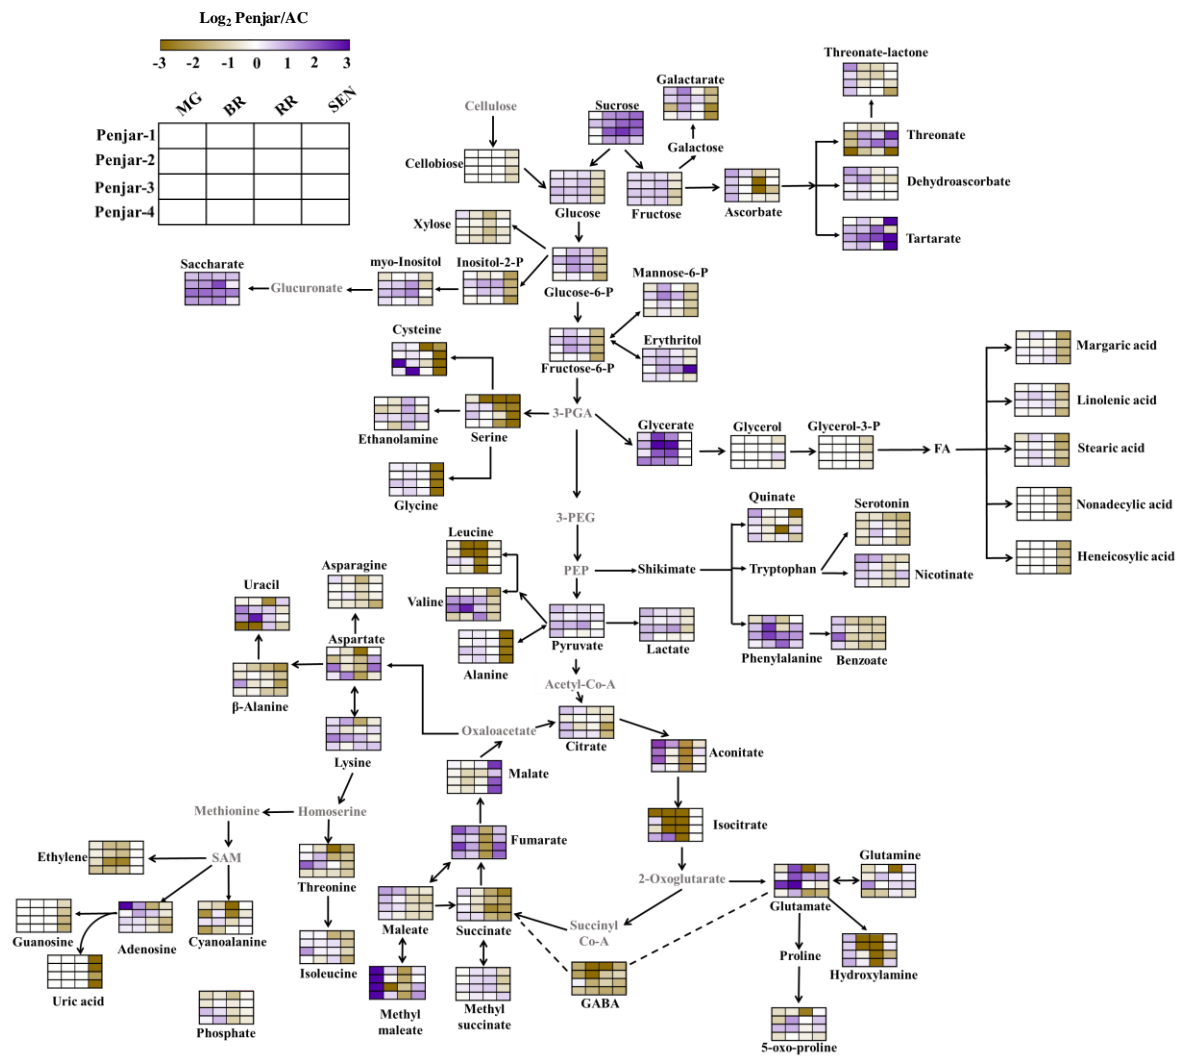

**Figure 6. The metabolic shifts in the fruits of Penjars in comparison to AC during ripening and post-harvest storage.** The relative abundances of the metabolites in Penjar fruits at MG, BR, RR and SEN stages were obtained from the  $\text{Log}_2$  Penjar/AC values and only those metabolites with  $\geq 1.5$  fold change ( $n=5 \pm \text{SE}$ ,  $P \leq 0.05$ ) were mapped on the pathway. The scale at the top left corner represents  $\text{Log}_2$  fold changes in the range of -3 to +3. The metabolites indicated in gray letters on the pathway were not detected in our GC-MS analysis.
